# Supplementary material
Source: publisher figshare collection journal article supplement (https://geolsoc.figshare.com/ndownloader/files/5425547)
Supplement: Supplementary file 1 [file 5425547]

,,,,,,,,,,,,,,,,,,,,,,,,,,,,,,,,,,,,,,,,,,,,,,,,,,,,,,,,,,,,,,,,,,,,,,,,,,,,,,,,,,,,,,,,,,,,,,,,,,,,,,,,,,,,,,,,,,,,,,,,,,,,,,,,,,,,,,,,,,,,,,,,,,,,,,,,,,,,,,,,,,,,,,,,,,,,,,,,,,,,,,0,583.9382403,964.6673107,-0.114113665,0.147983316
,,,,,,,,,,,,,,,,,,,,,,,,,,,,,,,,,,,,,,,,,,,,,,,,,,,,,,,,,,,,,,,,,,,,,,,,,,,,,,,,,,,,,,,,,,,,,,,,,,,,,,,,,,,,,,,,,,,,,,,,,,,,,,,,,,,,,,,,,,,,,,,,,,,,,,,,,,,,,,,,,,,,,,,,,,,,,,,,,,,,,,0.92266067,583.9382403,964.6673107,-0.114113665,0.147983316
,"Procedure
Blanks",,36Ar,1s,37Ar,1s,38Ar,1s,39Ar,1s,40Ar,1s,,"Intercept
Values",,36Ar,1s,r2,,,37Ar,1s,r2,,,38Ar,1s,r2,,,39Ar,1s,r2,,,40Ar,1s,r2,,,,"Sample
Parameters",,Sample,Material,Location,Analyst,Temp,Standard,%1s,J,%1s,Fract,%1s,Volume Correction,Sensitivity,Day,Month,Year,Hour,Min,Resist,Irradiation,Project,,"Irradiation
Constants",,40/36(a),%1s,38/36(a),%1s,39/37(ca),%1s,38/37(ca),%1s,36/37(ca),%1s,40/39(k),%1s,38/39(k),%1s,36/38(cl),%1s,K/Ca,%1s,K/Cl,%1s,Ca/Cl,%1s,,"Incremental
Heating",,,36Ar(a),37Ar(ca),38Ar(cl),39Ar(k),40Ar(r),Age,± 2s,40Ar(r),39Ar(k),K/Ca,± 2s,,"Normal
Isochron",,,39(k)/36(a),± 2s,40(a+r)/36(a),± 2s,,,r.i.,,"Inverse
Isochron",,,39(k)/40(a+r),± 2s,36(a)/40(a+r),± 2s,,,r.i.,,"Degassing
Patterns",,,36Ar(a),36Ar(ca),36Ar(cl),37Ar(ca),38Ar(a),38Ar(k),38Ar(ca),38Ar(cl),39Ar(k),39Ar(ca),40Ar(r),40Ar(a),40Ar(k),,"Additional
Ratios",,,40(r)/39(k),1s,40(r+a),1s,37Ar(decay),39Ar(decay),40Ar(moles),,,,,,,,,,,,,,,,,,,,,,,,,,,,0.92266067,1530.118757,-892.3141115,0.022820046,-0.018361797
,,,,,,,,,,,,,,,,,,,,,,,,,,,,,,,,,,,,,,,,,,,,,,,,,(in Ma),,,,,,,(mol/vol),,,,,,,,,,,,,,,,,,,,,,,,,,,,,,,,,,,,,,,,,,,(Ma),,(%),(%),,,,,,,,,,,,,,,,,,,,,,,,,,,,,,,,,,,,,,,,,,,,,,,,,,,,,,,,,,,,,,,,,,,,,,,,,,,,,,,,1.027402588,1530.118757,-892.3141115,0.022820046,-0.018361797
,,,,,,,,,,,,,,,,,,,,,,,,,,,,,,,,,,,,,,,,,,,,,,,,,,,,,,,,,,,,,,,,,,,,,,,,,,,,,,,,,,,,,,,,,,,,,,,,,,,,,,,,,,,,,,,,,,,,,,,,,,,,,,,,,,,,,,,,,,,,,,,,,,,,,,,,,,,,,,,,,,,,,,,,,,,,,,,,,,,,,,1.027402588,-3168.453667,6473.423329,-0.004875146,0.006433937
,  01M0311B, 0.30 W, 0.000622, 0.000259, 0.006837, 0.002821, 0.000340, 0.000639, 0.000785, 0.000975, 0.012104, 0.015739,,  01M0311B, 0.30 W, 0.002635, 0.000091,0.0928,LIN,# 5 , 0.007572, 0.000347,0.0479,EXP,# , 0.001288, 0.000135,0.9665,LIN,# , 0.009295, 0.000104,0.9886,EXP,# 6 , 2.067289, 0.002884,0.9715,EXP,# 1 7 ,,  01M0311B, 0.30 W,VU40-G9,hbl 2000-1,Galicia,Juan,0.3,25.26,0.1,0.002989,0.25,1.007,0.2,1,3.300E-18,24,09,2001,08,30,001,VU40,Juan2001,,  01M0311B, 0.30 W,295.5,0,0.1869,0,0.000673,0,0,0,0.000264,0,0.00086,9,0.01211,0,0,0,0.43,0,0,0,0,0,,  01M0311B, 0.30 W,, 0.00190,  0.21140, 0.00048,  0.00833,   1.49305,774.30,± 190.36, 72.65,  0.92,0.017,± 0.131,,  01M0311B, 0.30 W,,4,± 2,1080,± 391,,,0.801,,  01M0311B, 0.30 W,,0.004051,± 0.001092,0.000926,± 0.000335,,,0.002,,  01M0311B, 0.30 W,,   0.00190,   0.00006,   0.00000,   0.21140,   0.00036,   0.00010,   0.00000,   0.00048,   0.00833,   0.00014,   1.49305,   0.56212,   0.00001,,  01M0311B, 0.30 W,,179.33157,27.11268,  2.05518, 0.01600, 293.630432, 1.00203228,6.782E-18,,,,,,,,,,,,,,,,,,,,,,,,,,,,1.083989457,-3168.453667,6473.423329,-0.004875146,0.006433937
,  01M0311C, 0.50 W, 0.000636, 0.000259, 0.006390, 0.002821, 0.000256, 0.000639, 0.000785, 0.000975, 0.008947, 0.015739,,  01M0311C, 0.50 W, 0.002033, 0.000106,0.3013,LIN,# 1 6 , 0.007023, 0.000204,0.1464,EXP,# , 0.000614, 0.000189,0.9506,PAR,# 5 10 , 0.001858, 0.000138,0.9806,PAR,# 1 , 0.457613, 0.001157,0.9981,PAR,# 1 ,,  01M0311C, 0.50 W,VU40-G9,hbl 2000-1,Galicia,Juan,0.5,25.26,0.1,0.002989,0.25,1.007,0.2,1,3.300E-18,24,09,2001,08,57,001,VU40,Juan2001,,  01M0311C, 0.50 W,295.5,0,0.1869,0,0.000673,0,0,0,0.000264,0,0.00086,9,0.01211,0,0,0,0.43,0,0,0,0,0,,  01M0311C, 0.50 W,, 0.00131,  0.18232, 0.00010,  0.00095,   0.06114,318.90,± 1211.22, 13.63,  0.10,0.002,± 0.021,,  01M0311C, 0.50 W,,1,± 2,342,± 183,,,0.216,,  01M0311C, 0.50 W,,0.002107,± 0.005007,0.002923,± 0.001561,,,0.004,,  01M0311C, 0.50 W,,   0.00131,   0.00005,   0.00000,   0.18232,   0.00025,   0.00001,   0.00000,   0.00010,   0.00095,   0.00012,   0.06114,   0.38753,   0.00000,,  01M0311C, 0.50 W,, 64.68841,134.02317,  0.44867, 0.01578, 293.739288, 1.00203240,1.481E-18,,,,,,,,,,,,,,,,,,,,,,,,,,,,1.083989457,868.6980936,92.64715295,0.014278484,-0.00886875
,  01M0311D, 0.70 W, 0.000654, 0.000259, 0.006122, 0.002821, 0.000201, 0.000639, 0.000785, 0.000975, 0.007133, 0.015739,,  01M0311D, 0.70 W, 0.000909, 0.000109,0.7056,LIN,# 2 8 , 0.007101, 0.000229,0.0347,EXP,# , 0.000465, 0.000125,0.9817,PAR,# 5 8 , 0.001489, 0.000091,0.9940,PAR,# 5 , 0.314573, 0.000524,0.9997,EXP,# 1 ,,  01M0311D, 0.70 W,VU40-G9,hbl 2000-1,Galicia,Juan,0.7,25.26,0.1,0.002989,0.25,1.007,0.2,1,3.300E-18,24,09,2001,09,23,001,VU40,Juan2001,,  01M0311D, 0.70 W,295.5,0,0.1869,0,0.000673,0,0,0,0.000264,0,0.00086,9,0.01211,0,0,0,0.43,0,0,0,0,0,,  01M0311D, 0.70 W,, 0.00017,  0.28171, 0.00022,  0.00051,   0.25611,1652.48,± 4820.94, 83.30,  0.06,0.001,± 0.006,,  01M0311D, 0.70 W,,3,± 17,1770,± 7098,,,0.675,,  01M0311D, 0.70 W,,0.001661,± 0.007276,0.000565,± 0.002266,,,0.001,,  01M0311D, 0.70 W,,   0.00017,   0.00007,   0.00000,   0.28171,   0.00003,   0.00001,   0.00000,   0.00022,   0.00051,   0.00019,   0.25611,   0.05133,   0.00000,,  01M0311D, 0.70 W,,501.57378,1117.17769,  0.30744, 0.01575, 293.843994, 1.00203252,1.015E-18,,,,,,,,,,,,,,,,,,,,,,,,,,,,1.355567423,868.6980936,92.64715295,0.014278484,-0.00886875
,  01M0311G, 0.80 W, 0.000745, 0.000259, 0.006166, 0.002821, 0.000178, 0.000639, 0.000785, 0.000975, 0.008086, 0.015739,,  01M0311G, 0.80 W, 0.000785, 0.000109,0.2710,LIN,# 7 , 0.007518, 0.000157,0.1399,EXP,# , 0.000187, 0.000069,0.9922,PAR,# 3 7 , 0.003512, 0.000061,0.9940,PAR,# , 0.258399, 0.000770,0.9993,PAR,# 1 ,,  01M0311G, 0.80 W,VU40-G9,hbl 2000-1,Galicia,Juan,0.8,25.26,0.1,0.002989,0.25,1.007,0.2,1,3.300E-18,24,09,2001,10,50,001,VU40,Juan2001,,  01M0311G, 0.80 W,295.5,0,0.1869,0,0.000673,0,0,0,0.000264,0,0.00086,9,0.01211,0,0,0,0.43,0,0,0,0,0,,  01M0311G, 0.80 W,, 0.00000,  0.38958, 0.00000,  0.00245,   0.25031,480.67,± 388.03,100.00,  0.27,0.003,± 0.012,,  01M0311G, 0.80 W,,62,± 0,6005,± 0,,,0.999,,  01M0311G, 0.80 W,,0.009790,± 0.009003,0.000000,± 0.000000,,,0.000,,  01M0311G, 0.80 W,,   0.00000,   0.00004,   0.00000,   0.38958,   0.00000,   0.00003,   0.00000,   0.00000,   0.00245,   0.00026,   0.25031,   0.00000,   0.00000,,  01M0311G, 0.80 W,,102.14290,46.96358,  0.25031, 0.01576, 294.194916, 1.00203288,8.260E-19,,,,,,,,,,,,,,,,,,,,,,,,,,,,1.355567423,353.1283999,439.9581852,-0.043048195,0.086989947
,  01M0311H, 0.87 W, 0.000786, 0.000259, 0.006471, 0.002821, 0.000217, 0.000639, 0.000785, 0.000975, 0.010549, 0.015739,,  01M0311H, 0.87 W, 0.001577, 0.000142,0.1616,LIN,# 7 , 0.008387, 0.000254,0.0058,EXP,# , 0.001308, 0.000120,0.9832,PAR,# 6 , 0.029523, 0.000075,0.9799,LIN,# 1 3 4 , 2.515995, 0.003525,0.9911,PAR,# 1 ,,  01M0311H, 0.87 W,VU40-G9,hbl 2000-1,Galicia,Juan,0.87,25.26,0.1,0.002989,0.25,1.007,0.2,1,3.300E-18,24,09,2001,11,23,001,VU40,Juan2001,,  01M0311H, 0.87 W,295.5,0,0.1869,0,0.000673,0,0,0,0.000264,0,0.00086,9,0.01211,0,0,0,0.43,0,0,0,0,0,,  01M0311H, 0.87 W,4, 0.00062,  0.55238, 0.00062,  0.02822,   2.32128,396.54,± 43.41, 92.65,  3.13,0.022,± 0.065,,  01M0311H, 0.87 W,4,45,± 52,4021,± 4642,,,0.998,,  01M0311H, 0.87 W,4,0.011265,± 0.000905,0.000249,± 0.000287,,,0.002,,  01M0311H, 0.87 W,4,   0.00062,   0.00015,   0.00000,   0.55238,   0.00012,   0.00034,   0.00000,   0.00062,   0.02822,   0.00037,   2.32128,   0.18414,   0.00002,,  01M0311H, 0.87 W,4, 82.24572, 5.01519,  2.50542, 0.01613, 294.328064, 1.00203311,8.268E-18,,,,,,,,,,,,,,,,,,,,,,,,,,,,4.483355648,353.1283999,439.9581852,-0.043048195,0.086989947
,  01M0311I, 0.90 W, 0.000826, 0.000259, 0.006854, 0.002821, 0.000270, 0.000639, 0.000785, 0.000975, 0.013538, 0.015739,,  01M0311I, 0.90 W, 0.001319, 0.000131,0.0394,LIN,# , 0.007887, 0.000240,0.2941,EXP,# , 0.000838, 0.000132,0.9836,PAR,# 7 8 , 0.022738, 0.000239,0.7318,PAR,# 10 , 1.841179, 0.001703,0.9873,PAR,# 1 ,,  01M0311I, 0.90 W,VU40-G9,hbl 2000-1,Galicia,Juan,0.9,25.26,0.1,0.002989,0.25,1.007,0.2,1,3.300E-18,24,09,2001,11,54,001,VU40,Juan2001,,  01M0311I, 0.90 W,295.5,0,0.1869,0,0.000673,0,0,0,0.000264,0,0.00086,9,0.01211,0,0,0,0.43,0,0,0,0,0,,  01M0311I, 0.90 W,4, 0.00040,  0.29795, 0.00022,  0.02164,   1.70932,382.34,± 56.16, 93.53,  2.40,0.031,± 0.171,,  01M0311I, 0.90 W,4,54,± 96,4565,± 8108,,,0.998,,  01M0311I, 0.90 W,4,0.011842,± 0.001265,0.000219,± 0.000389,,,0.002,,  01M0311I, 0.90 W,4,   0.00040,   0.00008,   0.00000,   0.29795,   0.00007,   0.00026,   0.00000,   0.00022,   0.02164,   0.00020,   1.70932,   0.11830,   0.00002,,  01M0311I, 0.90 W,4, 78.97617, 6.43697,  1.82762, 0.01583, 294.453217, 1.00203323,6.031E-18,,,,,,,,,,,,,,,,,,,,,,,,,,,,4.483355648,438.4991719,326.1724216,0.202492867,-0.140021127
,  01M0311K, 0.92 W, 0.000896, 0.000259, 0.007708, 0.002821, 0.000393, 0.000639, 0.000785, 0.000975, 0.019982, 0.015739,,  01M0311K, 0.92 W, 0.000927, 0.000038,0.8952,EXP,# 1 4 , 0.007479, 0.000239,0.2182,EXP,# , 0.000838, 0.000250,0.9470,PAR,# 1 5 , 0.011748, 0.000161,0.9488,EXP,# 1 , 0.891266, 0.000499,0.9991,PAR,# 1 6 ,,  01M0311K, 0.92 W,VU40-G9,hbl 2000-1,Galicia,Juan,0.92,25.26,0.1,0.002989,0.25,1.007,0.2,1,3.300E-18,24,09,2001,12,51,001,VU40,Juan2001,,  01M0311K, 0.92 W,295.5,0,0.1869,0,0.000673,0,0,0,0.000264,0,0.00086,9,0.01211,0,0,0,0.43,0,0,0,0,0,,  01M0311K, 0.92 W,4, 0.00003,  0.00000, 0.00030,  0.01091,   0.86224,382.62,± 87.51, 98.96,  1.21,0.000,± 0.000,,  01M0311K, 0.92 W,4,357,± 5949,28489,± 475158,,,1.000,,  01M0311K, 0.92 W,4,0.012520,± 0.002303,0.000035,± 0.000585,,,0.000,,  01M0311K, 0.92 W,4,   0.00003,   0.00000,   0.00000,   0.00000,   0.00001,   0.00013,   0.00000,   0.00030,   0.01091,   0.00000,   0.86224,   0.00904,   0.00001,,  01M0311K, 0.92 W,4, 79.04127,10.03111,  0.87127, 0.01575, 294.683594, 1.00203359,2.875E-18,,,,,,,,,,,,,,,,,,,,,,,,,,,,6.881910908,438.4991719,326.1724216,0.202492867,-0.140021127
,  01M0311M, 0.95 W, 0.000917, 0.000259, 0.008027, 0.002821, 0.000440, 0.000639, 0.000785, 0.000975, 0.022324, 0.015739,,  01M0311M, 0.95 W, 0.001247, 0.000102,0.1909,LIN,# 1 6 , 0.008438, 0.000179,0.3003,EXP,# , 0.000843, 0.000088,0.9896,LIN,# 6 8 , 0.014209, 0.000192,0.9292,PAR,# 1 , 1.072930, 0.001390,0.9846,PAR,# 1 3 ,,  01M0311M, 0.95 W,VU40-G9,hbl 2000-1,Galicia,Juan,0.95,25.26,0.1,0.002989,0.25,1.007,0.2,1,3.300E-18,24,09,2001,13,11,001,VU40,Juan2001,,  01M0311M, 0.95 W,295.5,0,0.1869,0,0.000673,0,0,0,0.000264,0,0.00086,9,0.01211,0,0,0,0.43,0,0,0,0,0,,  01M0311M, 0.95 W,4, 0.00029,  0.11883, 0.00018,  0.01328,   0.96510,354.69,± 88.25, 91.86,  1.47,0.048,± 0.660,,  01M0311M, 0.95 W,4,46,± 110,3631,± 8695,,,0.997,,  01M0311M, 0.95 W,4,0.012638,± 0.002187,0.000275,± 0.000659,,,0.002,,  01M0311M, 0.95 W,4,   0.00029,   0.00003,   0.00000,   0.11883,   0.00005,   0.00016,   0.00000,   0.00018,   0.01328,   0.00008,   0.96510,   0.08550,   0.00001,,  01M0311M, 0.95 W,4, 72.68721, 9.96070,  1.05059, 0.01580, 294.764343, 1.00203359,3.467E-18,,,,,,,,,,,,,,,,,,,,,,,,,,,,6.881910908,295.1108842,470.1286735,1.00603E-08,1.00603E-08
,  01M0311N, 1.00 W, 0.000945, 0.000259, 0.008483, 0.002821, 0.000508, 0.000639, 0.000785, 0.000975, 0.025607, 0.015739,,  01M0311N, 1.00 W, 0.001102, 0.000175,0.5665,PAR,# 1 4 7 , 0.009845, 0.000156,0.4387,EXP,# , 0.001757, 0.000199,0.9858,PAR,# 1 5 , 0.054154, 0.000148,0.6496,PAR,# 1 6 7 , 4.324709, 0.007649,0.9938,PAR,# 1 ,,  01M0311N, 1.00 W,VU40-G9,hbl 2000-1,Galicia,Juan,1,25.26,0.1,0.002989,0.25,1.007,0.2,1,3.300E-18,24,09,2001,13,40,001,VU40,Juan2001,,  01M0311N, 1.00 W,295.5,0,0.1869,0,0.000673,0,0,0,0.000264,0,0.00086,9,0.01211,0,0,0,0.43,0,0,0,0,0,,  01M0311N, 1.00 W,4, 0.00005,  0.39326, 0.00058,  0.05284,   4.28466,391.52,± 23.71, 99.66,  5.86,0.058,± 0.240,,  01M0311N, 1.00 W,4,1085,± 16611,88267,± 1351444,,,1.000,,  01M0311N, 1.00 W,4,0.012291,± 0.000535,0.000011,± 0.000173,,,0.000,,  01M0311N, 1.00 W,4,   0.00005,   0.00010,   0.00000,   0.39326,   0.00001,   0.00064,   0.00000,   0.00058,   0.05284,   0.00026,   4.28466,   0.01439,   0.00005,,  01M0311N, 1.00 W,4, 81.08617, 2.73181,  4.29906, 0.01750, 294.881653, 1.00203383,1.419E-17,,,,,,,,,,,,,,,,,,,,,,,,,,,,8.090826619,295.1108842,470.1286735,1.00603E-08,1.00603E-08
,  01M0311P, 1.05 W, 0.000992, 0.000259, 0.009664, 0.002821, 0.000679, 0.000639, 0.000785, 0.000975, 0.033281, 0.015739,,  01M0311P, 1.05 W, 0.000859, 0.000071,0.9399,LIN,# 3 8 9 , 0.008979, 0.000075,0.5506,LIN,# 8 9 , 0.000929, 0.000160,0.9892,PAR,# 3 5 , 0.037215, 0.000102,0.9714,EXP,# 1 , 2.969327, 0.003918,0.9897,EXP,# ,,  01M0311P, 1.05 W,VU40-G9,hbl 2000-1,Galicia,Juan,1.05,25.26,0.1,0.002989,0.25,1.007,0.2,1,3.300E-18,24,09,2001,15,15,001,VU40,Juan2001,,  01M0311P, 1.05 W,295.5,0,0.1869,0,0.000673,0,0,0,0.000264,0,0.00086,9,0.01211,0,0,0,0.43,0,0,0,0,0,,  01M0311P, 1.05 W,4, 0.00000,  0.00000, 0.00000,  0.03625,   2.93602,391.11,± 19.37,100.00,  4.02,0.000,± 0.000,,  01M0311P, 1.05 W,4,,± 0,,± 0,,,,,  01M0311P, 1.05 W,4,0.012347,± 0.000680,0.000000,± 0.000000,,,,,  01M0311P, 1.05 W,4,   0.00000,  neg  --,   0.00000,   0.00000,   0.00000,   0.00044,   0.00000,   0.00000,   0.03625,   0.00000,   2.93602,   0.00000,   0.00003,,  01M0311P, 1.05 W,4, 80.99285, 2.23113,  2.93602, 0.01622, 295.266205, 1.00203431,9.689E-18,,,,,,,,,,,,,,,,,,,,,,,,,,,,8.090826619,442.9394306,266.4386394,0.707954796,-0.611866472
,  01M0311Q, 1.10 W, 0.000986, 0.000259, 0.009862, 0.002821, 0.000704, 0.000639, 0.000785, 0.000975, 0.034010, 0.015739,,  01M0311Q, 1.10 W, 0.000183, 0.000014,0.6699,LIN,# 1 , 0.001237, 0.000021,0.1109,EXP,# , 0.000338, 0.000027,0.9889,LIN,# 1 4 , 0.014114, 0.000021,0.9895,PAR,# , 1.121473, 0.000813,0.9993,PAR,# ,,  01M0311Q, 1.10 W,VU40-G9,hbl 2000-1,Galicia,Juan,1.1,25.26,0.1,0.002989,0.25,1.007,0.2,1,3.300E-18,24,09,2001,15,50,010,VU40,Juan2001,,  01M0311Q, 1.10 W,295.5,0,0.1869,0,0.000673,0,0,0,0.000264,0,0.00086,9,0.01211,0,0,0,0.43,0,0,0,0,0,,  01M0311Q, 1.10 W,4, 0.00063,  0.72523, 0.00084,  0.13918,  10.99467,382.43,± 8.87, 98.34, 15.42,0.083,± 0.186,,  01M0311Q, 1.10 W,4,221,± 252,17769,± 20230,,,1.000,,  01M0311Q, 1.10 W,4,0.012448,± 0.000213,0.000056,± 0.000064,,,0.001,,  01M0311Q, 1.10 W,4,   0.00063,   0.00019,   0.00000,   0.72523,   0.00012,   0.00169,   0.00000,   0.00084,   0.13918,   0.00049,  10.99467,   0.18593,   0.00012,,  01M0311Q, 1.10 W,4, 78.99810, 1.01717, 11.18060, 0.01771, 295.407990, 1.00203443,3.690E-17,,,,,,,,,,,,,,,,,,,,,,,,,,,,9.562244125,442.9394306,266.4386394,0.707954796,-0.611866472
,  01M0311R, 1.15 W, 0.000720, 0.000259, 0.007788, 0.002821, 0.000337, 0.000639, 0.000785, 0.000975, 0.012196, 0.015739,,  01M0311R, 1.15 W, 0.000173, 0.000012,0.7989,LIN,# , 0.001361, 0.000027,0.4765,EXP,# , 0.000218, 0.000023,0.9929,PAR,# 1 , 0.016823, 0.000031,0.9915,PAR,# 1 4 , 1.307149, 0.001282,0.9990,PAR,# 1 ,,  01M0311R, 1.15 W,VU40-G9,hbl 2000-1,Galicia,Juan,1.15,25.26,0.1,0.002989,0.25,1.007,0.2,1,3.300E-18,24,09,2001,18,28,010,VU40,Juan2001,,  01M0311R, 1.15 W,295.5,0,0.1869,0,0.000673,0,0,0,0.000264,0,0.00086,9,0.01211,0,0,0,0.43,0,0,0,0,0,,  01M0311R, 1.15 W,4, 0.00054,  1.68925, 0.00000,  0.16548,  12.90048,377.89,± 7.51, 98.78, 18.34,0.042,± 0.041,,  01M0311R, 1.15 W,4,308,± 406,24321,± 32063,,,1.000,,  01M0311R, 1.15 W,4,0.012672,± 0.000189,0.000041,± 0.000054,,,0.000,,  01M0311R, 1.15 W,4,   0.00054,   0.00045,   0.00000,   1.68925,   0.00010,   0.00200,   0.00000,   0.00000,   0.16548,   0.00114,  12.90048,   0.15867,   0.00014,,  01M0311R, 1.15 W,4, 77.95725, 0.85905, 13.05915, 0.02030, 296.048920, 1.00203514,4.310E-17,,,,,,,,,,,,,,,,,,,,,,,,,,,,9.562244125,367.8030148,415.2317854,-0.182076717,0.297631141
,  01M0311T, 1.20 W, 0.000879, 0.000259, 0.009321, 0.002821, 0.000598, 0.000639, 0.000785, 0.000975, 0.026799, 0.015739,,  01M0311T, 1.20 W, 0.000918, 0.000143,0.9385,LIN,# 6 7 8 9 10 , 0.012189, 0.000420,0.3859,EXP,# 5 6 7 8 9 10 , 0.001707, 0.000448,0.9309,EXP,# 6 7 8 9 10 , 0.105829, 0.000528,0.9284,PAR,# 7 8 9 10 , 8.145618, 0.026693,0.9888,EXP,# 7 8 9 10 ,,  01M0311T, 1.20 W,VU40-G9,hbl 2000-1,Galicia,Juan,1.2,25.26,0.1,0.002989,0.25,1.007,0.2,1,3.300E-18,24,09,2001,17,25,001,VU40,Juan2001,,  01M0311T, 1.20 W,295.5,0,0.1869,0,0.000673,0,0,0,0.000264,0,0.00086,9,0.01211,0,0,0,0.43,0,0,0,0,0,,  01M0311T, 1.20 W,4, 0.00000,  0.83079, 0.00000,  0.10397,   8.11873,378.47,± 8.64,100.00, 11.52,0.054,± 0.107,,  01M0311T, 1.20 W,4,201,± 0,15569,± 0,,,0.958,,  01M0311T, 1.20 W,4,0.012806,± 0.000324,0.000000,± 0.000000,,,0.134,,  01M0311T, 1.20 W,4,   0.00000,   0.00004,   0.00000,   0.83079,   0.00000,   0.00126,   0.00000,   0.00000,   0.10397,   0.00056,   8.11873,   0.00000,   0.00009,,  01M0311T, 1.20 W,4, 78.09001, 0.98774,  8.11873, 0.03099, 295.793152, 1.00203490,2.679E-17,,,,,,,,,,,,,,,,,,,,,,,,,,,,15.41813564,367.8030148,415.2317854,-0.182076717,0.297631141
,  01M0311U, 1.22 W, 0.000787, 0.000259, 0.008476, 0.002821, 0.000453, 0.000639, 0.000785, 0.000975, 0.018592, 0.015739,,  01M0311U, 1.22 W, 0.000106, 0.000014,0.8052,LIN,# 1 8 , 0.001102, 0.000026,0.2215,EXP,# , 0.000205, 0.000009,0.9974,PAR,# 1 5 , 0.005308, 0.000005,0.9930,PAR,# 1 3 4 9 , 0.416449, 0.000757,0.9929,PAR,# 1 ,,  01M0311U, 1.22 W,VU40-G9,hbl 2000-1,Galicia,Juan,1.22,25.26,0.1,0.002989,0.25,1.007,0.2,1,3.300E-18,24,09,2001,18,05,010,VU40,Juan2001,,  01M0311U, 1.22 W,295.5,0,0.1869,0,0.000673,0,0,0,0.000264,0,0.00086,9,0.01211,0,0,0,0.43,0,0,0,0,0,,  01M0311U, 1.22 W,4, 0.00007,  0.73615, 0.00093,  0.05154,   4.12460,386.92,± 23.63, 99.49,  5.71,0.030,± 0.067,,  01M0311U, 1.22 W,4,717,± 7141,57657,± 574410,,,1.000,,  01M0311U, 1.22 W,4,0.012432,± 0.000552,0.000017,± 0.000173,,,0.000,,  01M0311U, 1.22 W,4,   0.00007,   0.00019,   0.00000,   0.73615,   0.00001,   0.00062,   0.00000,   0.00093,   0.05154,   0.00050,   4.12460,   0.02125,   0.00004,,  01M0311U, 1.22 W,4, 80.02790, 2.71519,  4.14585, 0.01746, 295.955536, 1.00203502,1.368E-17,,,,,,,,,,,,,,,,,,,,,,,,,,,,15.41813564,410.4846951,371.7398759,9.09065E-06,9.09065E-06
,  01M0311V, 1.30 W, 0.000694, 0.000259, 0.007511, 0.002821, 0.000290, 0.000639, 0.000785, 0.000975, 0.009663, 0.015739,,  01M0311V, 1.30 W, 0.000139, 0.000021,0.7084,LIN,# 1 6 7 , 0.001279, 0.000024,0.4803,EXP,# , 0.000227, 0.000015,0.9961,PAR,# 5 10 , 0.011663, 0.000009,0.9991,PAR,# 1 4 8 , 0.918976, 0.001509,0.9983,PAR,# 1 5 ,,  01M0311V, 1.30 W,VU40-G9,hbl 2000-1,Galicia,Juan,1.3,25.26,0.1,0.002989,0.25,1.007,0.2,1,3.300E-18,24,09,2001,18,36,010,VU40,Juan2001,,  01M0311V, 1.30 W,295.5,0,0.1869,0,0.000673,0,0,0,0.000264,0,0.00086,9,0.01211,0,0,0,0.43,0,0,0,0,0,,  01M0311V, 1.30 W,4, 0.00027,  1.53109, 0.00052,  0.11424,   9.10034,385.31,± 11.38, 99.13, 12.66,0.032,± 0.035,,  01M0311V, 1.30 W,4,424,± 1235,34053,± 99240,,,1.000,,  01M0311V, 1.30 W,4,0.012445,± 0.000256,0.000029,± 0.000086,,,0.000,,  01M0311V, 1.30 W,4,   0.00027,   0.00040,   0.00000,   1.53109,   0.00005,   0.00138,   0.00000,   0.00052,   0.11424,   0.00103,   9.10034,   0.07966,   0.00010,,  01M0311V, 1.30 W,4, 79.65734, 1.30613,  9.18000, 0.02181, 296.081390, 1.00203526,3.029E-17,,,,,,,,,,,,,,,,,,,,,,,,,,,,19.43543868,410.4846951,371.7398759,9.09065E-06,9.09065E-06
,  01M0311X, 1.35 W, 0.000479, 0.000259, 0.005096, 0.002821, 0.000290, 0.000639, 0.000785, 0.000975, 0.009663, 0.015739,,  01M0311X, 1.35 W, 0.000117, 0.000014,0.6586,EXP,# 1 7 , 0.001137, 0.000032,0.0386,EXP,# , 0.000182, 0.000032,0.9714,PAR,# 1 4 , 0.006520, 0.000014,0.7065,PAR,# 1 3 9 , 0.510417, 0.000977,0.9930,PAR,# 1 ,,  01M0311X, 1.35 W,VU40-G9,hbl 2000-1,Galicia,Juan,1.35,25.26,0.1,0.002989,0.25,1.007,0.2,1,3.300E-18,24,09,2001,19,30,010,VU40,Juan2001,,  01M0311X, 1.35 W,295.5,0,0.1869,0,0.000673,0,0,0,0.000264,0,0.00086,9,0.01211,0,0,0,0.43,0,0,0,0,0,,  01M0311X, 1.35 W,4, 0.00019,  1.82159, 0.00071,  0.06287,   5.03684,387.32,± 19.53, 98.87,  6.97,0.015,± 0.014,,  01M0311X, 1.35 W,4,322,± 1189,26127,± 96352,,,1.000,,  01M0311X, 1.35 W,4,0.012340,± 0.000455,0.000038,± 0.000141,,,0.000,,  01M0311X, 1.35 W,4,   0.00019,   0.00048,   0.00000,   1.82159,   0.00004,   0.00076,   0.00000,   0.00071,   0.06287,   0.00123,   5.03684,   0.05762,   0.00005,,  01M0311X, 1.35 W,4, 80.11968, 2.24478,  5.09446, 0.01853, 296.300751, 1.00203550,1.681E-17,,,,,,,,,,,,,,,,,,,,,,,,,,,,19.43543868,373.5570342,391.3058977,-0.103943862,0.268983678
,  01M0311Y, 1.55 W, 0.000312, 0.000259, 0.003106, 0.002821, 0.000290, 0.000639, 0.000785, 0.000975, 0.009663, 0.015739,,  01M0311Y, 1.55 W, 0.000176, 0.000025,0.1768,LIN,# 1 8 , 0.001226, 0.000027,0.5467,EXP,# , 0.000215, 0.000027,0.9789,LIN,# 5 , 0.008833, 0.000036,0.9061,PAR,# 1 8 , 0.692783, 0.001117,0.9972,PAR,# 1 ,,  01M0311Y, 1.55 W,VU40-G9,hbl 2000-1,Galicia,Juan,1.55,25.26,0.1,0.002989,0.25,1.007,0.2,1,3.300E-18,24,09,2001,20,03,010,VU40,Juan2001,,  01M0311Y, 1.55 W,295.5,0,0.1869,0,0.000673,0,0,0,0.000264,0,0.00086,9,0.01211,0,0,0,0.43,0,0,0,0,0,,  01M0311Y, 1.55 W,4, 0.00071,  2.65925, 0.00067,  0.08532,   6.70864,380.82,± 15.91, 96.97,  9.46,0.014,± 0.009,,  01M0311Y, 1.55 W,4,120,± 141,9760,± 11413,,,1.000,,  01M0311Y, 1.55 W,4,0.012333,± 0.000351,0.000102,± 0.000120,,,0.001,,  01M0311Y, 1.55 W,4,   0.00071,   0.00070,   0.00000,   2.65925,   0.00013,   0.00103,   0.00000,   0.00067,   0.08532,   0.00179,   6.70864,   0.20946,   0.00007,,  01M0311Y, 1.55 W,4, 78.62983, 1.82139,  6.91809, 0.01930, 296.434875, 1.00203562,2.283E-17,,,,,,,,,,,,,,,,,,,,,,,,,,,,34.85913419,373.5570342,391.3058977,-0.103943862,0.268983678
,  01M0311Z, 1.80 W, 0.000129, 0.000259, 0.000844, 0.002821, 0.000290, 0.000639, 0.000785, 0.000975, 0.009663, 0.015739,,  01M0311Z, 1.80 W, 0.000103, 0.000009,0.7809,LIN,# 5 , 0.000994, 0.000028,0.2004,EXP,# , 0.000143, 0.000013,0.9858,PAR,# 5 8 , 0.000698, 0.000010,0.9956,EXP,# 1 6 , 0.050871, 0.000151,0.9988,PAR,# 1 ,,  01M0311Z, 1.80 W,VU40-G9,hbl 2000-1,Galicia,Juan,1.8,25.26,0.1,0.002989,0.25,1.007,0.2,1,3.300E-18,24,09,2001,20,34,010,VU40,Juan2001,,  01M0311Z, 1.80 W,295.5,0,0.1869,0,0.000673,0,0,0,0.000264,0,0.00086,9,0.01211,0,0,0,0.43,0,0,0,0,0,,  01M0311Z, 1.80 W,4, 0.00018,  2.64177, 0.00104,  0.00438,   0.44695,479.82,± 291.21, 89.56,  0.49,0.001,± 0.001,,  01M0311Z, 1.80 W,4,25,± 98,2831,± 11103,,,0.991,,  01M0311Z, 1.80 W,4,0.008786,± 0.004547,0.000353,± 0.001386,,,0.002,,  01M0311Z, 1.80 W,4,   0.00018,   0.00070,   0.00000,   2.64177,   0.00003,   0.00005,   0.00000,   0.00104,   0.00438,   0.00178,   0.44695,   0.05209,   0.00000,,  01M0311Z, 1.80 W,4,101.93615,35.22957,  0.49905, 0.01581, 296.561066, 1.00203574,1.647E-18,,,,,,,,,,,,,,,,,,,,,,,,,,,,34.85913419,385.3990232,370.3713428,0.083368111,0.000878758
,,,,,,,,,,,,,,,,,,,,,,,,,,,,,,,,,,,,,,,,,,,,,,,,,,,,,,,,,,,,,,,,,,,,,,,,,,,,,,,,,,,,,,,,,,,,,,,,,,,,,,,,,,,,,,,,,,,,,,,,,,,,,,,,,,,,,,,,,,,,,,,,,,,,,,,,,,,,,,,,,,,,,,,,,,,,,,,,,,,,,,53.19799678,385.3990232,370.3713428,0.083368111,0.000878758
,,,,,,,,,,,,,,,,,,,,,,,,,,,,,,,,,,,,,,,,,,,,,,,,,,,,,,,,,,,,,,,,,,,,,,,,,,,,,,,,,,,,,,,,,,,,,,,,,,,,,,,,,,,,,,,,,,,,,,,,,,,,,,,,,,,,,,,,,,,,,,,,,,,,,,,,,,,,,,,,,,,,,,,,,,,,,,,,,,,,,,53.19799678,369.829047,387.1023679,-0.053390741,0.161012781
,,,,,,,,,,,,,,,,,,,,,,,,,,,,,,,,,,,,,,,,,,,,,,,,,,,,,,,,,,,,,,,,,,,,,,,,,,,,,,,,,,,,,,,,,,,,,S, 0.00737, 15.06254, 0.00741,  0.90235,  72.57047,,,,,,,,,,,,,,,,,,,,,,,,,,,,,,,,S,   0.00737,   0.00360,   0.00000,  15.06254,   0.00138,   0.01093,   0.00000,   0.00741,   0.90235,   0.01014,  72.57047,   2.17703,   0.00078,,,,,,,,,,,,,,,,,,,,,,,,,,,,,,,,,,,,,,,64.71967046,369.829047,387.1023679,-0.053390741,0.161012781
,,,,,,,,,,,,,,,,,,,,,,,,,,,,,,,,,,,,,,,,,,,,,,,,,,,,,,,,,,,,,,,,,,,,,,,,,,,,,,,,,,,,,,,,,,,,,,,,,,,,,,,,,,,,,,,,,,,,,,,,,,,,,,,,,,,,,,,,,,,,,,,,,,,,,,,,,,,,,,,,,,,,,,,,,,,,,,,,,,,,,,64.71967046,410.5484374,363.2879367,0.09736154,-0.037150606
,,,,,,,,,,,,,,,,,,,,,,,,,,,,,,,,,,,,,,,,,,,,,,,,,,,,,,,,,,,,,,,,,,,,,,,,,,,,,,,,,,,,,,,,,,,,,,,,,,,,,,,,,,,,,,,,,,,,,,,,,,,,,,,,,,,,,,,,,,,,,,,,,,,,,,,,,,,,,,,,,,,,,,,,,,,,,,,,,,,,,,70.43134992,410.5484374,363.2879367,0.09736154,-0.037150606
,,,,,,,,,,,,,,,,,,,,,,,,,,,,,,,,,,,,,,,,,,,,,,,,,,,,,,,,,,,,,,,,,,,,,,,,,,,,,,,,,,,,,,,,,,,,,,,,,,,,,,,,,,,,,,,,,,,,,,,,,,,,,,,,,,S,,,   0.01097,  15.06254,,,,   0.01972,,   0.91249,,,  74.74828,,,,,,,,,,,,,,,,,,,,,,,,,,,,,,,,,,,,,,,70.43134992,373.9275755,396.6824431,-0.002508194,0.066677666
,,,,,,,,,,,,,,,,,,,,,,,,,,,,,,,,,,,,,,,,,,,,,,,,,,,,,,,,,,,,,,,,,,,,,,,,,,,,,,,,,,,,,,,,,,,"Information
on Analysis",,,,Results,,40(r)/39(k),± 2s,Age,± 2s,MSWD,39Ar(k),K/Ca,± 2s,,Results,,,40(a)/36(a),± 2s,40(r)/39(k),± 2s,Age,± 2s,MSWD,,Results,,,40(a)/36(a),± 2s,40(r)/39(k),± 2s,Age,± 2s,MSWD,,,,,,,,,,,,,,,,,,,,,,,,,,,,,,,,,,,,,,,,,,,,,,,,,,,,,,,,83.09196719,373.9275755,396.6824431,-0.002508194,0.066677666
,,,,,,,,,,,,,,,,,,,,,,,,,,,,,,,,,,,,,,,,,,,,,,,,,,,,,,,,,,,,,,,,,,,,,,,,,,,,,,,,,,,,,,,,,,,,,,,,,,,(Ma),,,"(%,n)",,,,,,,,,,,(Ma),,,,,,,,,,,(Ma),,,,,,,,,,,,,,,,,,,,,,,,,,,,,,,,,,,,,,,,,,,,,,,,,,,,,,,,,,83.09196719,406.8495244,367.785526,0.028371297,0.001308835
,,,,,,,,,,,,,,,,,,,,,,,,,,,,,,,,,,,,,,,,,,,,,,,,,,,,,,,,,,,,,,,,,,,,,,,,,,,,,,,,,,,,,,,,,,,,,,,,,,,,,,,,,,,,,,,,,,,,,,,,,,,,,,,,,,,,,,,,,,,,,,,,,,,,,,,,,,,,,,,,,,,,,,,,,,,,,,,,,,,,,,90.05890082,406.8495244,367.785526,0.028371297,0.001308835
,,,,,,,,,,,,,,,,,,,,,,,,,,,,,,,,,,,,,,,,,,,,,,,,,,,,,,,,,,,,,,,,,,,,,,,,,,,,,,,,,,,,,,,,,,,  Sample,VU40-G9,,,Weighted Plateau,,78.8098,± 0.8955,381.61,± 4.27,0.42  ,98.64,0.001,± 0.002,,No Convergence,,,7.6417,± 313.2609,80.8281,± 1.7190,390.40,± 7.67,0.45,,Isochron,,,611.0078,± 757.8649,77.6135,± 2.8938,376.38,± 12.78,0.20,,,,,,,,,,,,,,,,,,,,,,,,,,,,,,,,,,,,,,,,,,,,,,,,,,,,,,,,90.05890082,364.9190502,396.7293927,0.005117961,0.022474261
,,,,,,,,,,,,,,,,,,,,,,,,,,,,,,,,,,,,,,,,,,,,,,,,,,,,,,,,,,,,,,,,,,,,,,,,,,,,,,,,,,,,,,,,,,,  Material,hbl 2000-1,,,,,,± 1.14%,,± 1.12%,,14,,,,,,,,± 4099.34%,,± 2.13%,,± 1.96%,,,,,,,± 124.04%,,± 3.73%,,± 3.40%,,,,,,,,,,,,,,,,,,,,,,,,,,,,,,,,,,,,,,,,,,,,,,,,,,,,,,,,,99.51408204,364.9190502,396.7293927,0.005117961,0.022474261
,,,,,,,,,,,,,,,,,,,,,,,,,,,,,,,,,,,,,,,,,,,,,,,,,,,,,,,,,,,,,,,,,,,,,,,,,,,,,,,,,,,,,,,,,,,  Location,Galicia,,,External Error,,,,,± 8.75,2.16  ,Statistical T ratio,,,,External Error,,,,,,,,± 10.94,,,External Error,,,,,,,,± 14.83,,,,,,,,,,,,,,,,,,,,,,,,,,,,,,,,,,,,,,,,,,,,,,,,,,,,,,,,,99.51408204,771.0321843,188.6044796,0.001295459,0.000131911
,,,,,,,,,,,,,,,,,,,,,,,,,,,,,,,,,,,,,,,,,,,,,,,,,,,,,,,,,,,,,,,,,,,,,,,,,,,,,,,,,,,,,,,,,,,  Analyst,Juan,,,Analytical Error,,,,,± 3.91,1.0000  ,Error Magnification,,,,Analytical Error,,,,,,,,± 7.47,,,Analytical Error,,,,,,,,± 12.67,,,,,,,,,,,,,,,,,,,,,,,,,,,,,,,,,,,,,,,,,,,,,,,,,,,,,,,,,99.99999156,771.0321843,188.6044796,0.001295459,0.000131911
,,,,,,,,,,,,,,,,,,,,,,,,,,,,,,,,,,,,,,,,,,,,,,,,,,,,,,,,,,,,,,,,,,,,,,,,,,,,,,,,,,,,,,,,,,,,,,,,,,,,,,,,,,,,,,,,,,,,,,,,,,,,,,,,,,,,,,,,,,,,,,,,,,,,,,,,,,,,,,,,,,,,,,,,,,,,,,,,,,,,,,,,,,
,,,,,,,,,,,,,,,,,,,,,,,,,,,,,,,,,,,,,,,,,,,,,,,,,,,,,,,,,,,,,,,,,,,,,,,,,,,,,,,,,,,,,,,,,,,,,,,,,,,,,,,,,,,,,,,,,,,,,,,,,,,,,,,,,,,,,,,,,,,,,,,,,,,,,,,,,,,,,,,,,,,,,,,,,,,,,,,,,,,,,,,,,,
,,,,,,,,,,,,,,,,,,,,,,,,,,,,,,,,,,,,,,,,,,,,,,,,,,,,,,,,,,,,,,,,,,,,,,,,,,,,,,,,,,,,,,,,,,,  Project,Juan2001,,,Total Fusion Age,,80.4235,± 1.2545,388.64,± 5.73,,18,0.026,± 0.011,,,,,,,,,,,,,,,,,,,,,,,,,,,,,,,,,,,,,,,,,,,,,,,,,,,,,,,,,,,,,,,,,,,,,,,,,,,,,,,,,,
,,,,,,,,,,,,,,,,,,,,,,,,,,,,,,,,,,,,,,,,,,,,,,,,,,,,,,,,,,,,,,,,,,,,,,,,,,,,,,,,,,,,,,,,,,,  Irradiation,VU40,,,,,,± 1.56%,,± 1.47%,,,,,,Statistics,,,Statistical F ratio,1.75 ,,Convergence,0.0000980847,,,,Statistics,,,Statistical F ratio,1.75 ,,Convergence,0.0000001802,,,,,,,,,,,,,,,,,,,,,,,,,,,,,,,,,,,,,,,,,,,,,,,,,,,,,,,,,,,,,,
,,,,,,,,,,,,,,,,,,,,,,,,,,,,,,,,,,,,,,,,,,,,,,,,,,,,,,,,,,,,,,,,,,,,,,,,,,,,,,,,,,,,,,,,,,,  J-value,0.002989,,,External Error,,,,,± 9.65,,,,,,,,,Error Magnification,1.0000 ,,Number of Iterations,100,,,,,,,Error Magnification,1.0000 ,,Number of Iterations,9,,,,,,,,,,,,,,,,,,,,,,,,,,,,,,,,,,,,,,,,,,,,,,,,,,,,,,,,,,,,,,
,,,,,,,,,,,,,,,,,,,,,,,,,,,,,,,,,,,,,,,,,,,,,,,,,,,,,,,,,,,,,,,,,,,,,,,,,,,,,,,,,,,,,,,,,,,  Standard,25.26,,,Analytical Error,,,,,± 5.45,,,,,,,,,n,14 ,,Calculated Line,Weighted York-2,,,,,,,n,14 ,,Calculated Line,Weighted York-2,,,,,,,,,,,,,,,,,,,,,,,,,,,,,,,,,,,,,,,,,,,,,,,,,,,,,,,,,,,,,,
,,,,,,,,,,,,,,,,,,,,,,,,,,,,,,,,,,,,,,,,,,,,,,,,,,,,,,,,,,,,,,,,,,,,,,,,,,,,,,,,,,,,,,,,,,,,,,,,,,,,,,,,,,,,,,,,,,,,,,,,,,,,,,,,,,,,,,,,,,,,,,,,,,,,,,,,,,,,,,,,,,,,,,,,,,,,,,,,,,,,,,,,,,
,,,,,,,,,,,,,,,,,,,,,,,,,,,,,,,,,,,,,,,,,,,,,,,,,,,,,,,,,,,,,,,,,,,,,,,,,,,,,,,,,,,,,,,,,,,,,,,,,,,,,,,,,,,,,,,,,,,,,,,,,,,,,,,,,,,,,,,,,,,,,,,,,,,,,,,,,,,,,,,,,,,,,,,,,,,,,,,,,,,,,,,,,,
,,,,,,,,,,,,,,,,,,,,,,,,,,,,,,,,,,,,,,,,,,,,,,,,,,,,,,,,,,,,,,,,,,,,,,,,,,,,,,,,,,,,,,,,,,,,,,,,,,,,,,,,,,,,,,,,,,,,,,,,,,,,,,,,,,,,,,,,,,,,,,,,,,,,,,,,,,,,,,,,,,,,,,,,,,,,,,,,,,,,,,,,,,
,,,,,,,,,,,,,,,,,,,,,,,,,,,,,,,,,,,,,,,,,,,,,,,,,,,,,,,,,,,,,,,,,,,,,,,,,,,,,,,,,,,,,,,,,,,,,,,,,,,,,,,,,,,,,,,,,,,,,,,,,,,,,,,,,,,,,,,,,,,,,,,,,,,,,,,,,,,,,,,,,,,,,,,,,,,,,,,,,,,,,,,,,,
,,,,,,,,,,,,,,,,,,,,,,,,,,,,,,,,,,,,,,,,,,,,,,,,,,,,,,,,,,,,,,,,,,,,,,,,,,,,,,,,,,,,,,,,,,,,,,,,,,,,,,,,,,,,,,,,,,,,,,,,,,,,,,,,,,,,,,,,,,,,,,,,,,,,,,,,,,,,,,,,,,,,,,,,,,,,,,,,,,,,,,,,,,
,,,,,,,,,,,,,,,,,,,,,,,,,,,,,,,,,,,,,,,,,,,,,,,,,,,,,,,,,,,,,,,,,,,,,,,,,,,,,,,,,,,,,,,,,,,,,,,,,,,,,,,,,,,,,,,,,,,,,,,,,,,,,,,,,,,,,,,,,,,,,,,,,,,,,,,,,,,,,,,,,,,,,,,,,,,,,,,,,,,,,,,,,,
,,,,,,,,,,,,,,,,,,,,,,,,,,,,,,,,,,,,,,,,,,,,,,,,,,,,,,,,,,,,,,,,,,,,,,,,,,,,,,,,,,,,,,,,,,,,,,,,,,,,,,,,,,,,,,,,,,,,,,,,,,,,,,,,,,,,,,,,,,,,,,,,,,,,,,,,,,
,,,,,,,,,,,,,,,,,,,,,,,,,,,,,,,,,,,,,,,,,,,,,,,,,,,,,,,,,,,,,,,,,,,,,,,,,,,,,,,,,,,,,,,,,,,,,,,,,,,,,,,,,,,,,,,,,,,,,,,,,,,,,,,,,,,,,,,,,,,,,,,,,,,,,,,,,,
,,,,,,,,,,,,,,,,,,,,,,,,,,,,,,,,,,,,,,,,,,,,,,,,,,,,,,,,,,,,,,,,,,,,,,,,,,,,,,,,,,,,,,,,,,,,,,,,,,,,,,,,,,,,,,,,,,,,,,,,,,,,,,,,,,,,,,,,,,,,,,,,,,,,,,,,,,
,,,,,,,,,,,,,,,,,,,,,,,,,,,,,,,,,,,,,,,,,,,,,,,,,,,,,,,,,,,,,,,,,,,,,,,,,,,,,,,,,,,,,,,,,,,,,,,,,,,,,,,,,,,,,,,,,,,,,,,,,,,,,,,,,,,,,,,,,,,,,,,,,,,,,,,,,,
,,,,,,,,,,,,,,,,,,,,,,,,,,,,,,,,,,,,,,,,,,,,,,,,,,,,,,,,,,,,,,,,,,,,,,,,,,,,,,,,,,,,,,,,,,,,,,,,,,,,,,,,,,,,,,,,,,,,,,,,,,,,,,,,,,,,,,,,,,,,,,,,,,,,,,,,,,
,,,,,,,,,,,,,,,,,,,,,,,,,,,,,,,,,,,,,,,,,,,,,,,,,,,,,,,,,,,,,,,,,,,,,,,,,,,,,,,,,,,,,,,,,,,,,,,,,,,,,,,,,,,,,,,,,,,,,,,,,,,,,,,,,,,,,,,,,,,,,,,,,,,,,,,,,,
,,,,,,,,,,,,,,,,,,,,,,,,,,,,,,,,,,,,,,,,,,,,,,,,,,,,,,,,,,,,,,,,,,,,,,,,,,,,,,,,,,,,,,,,,,,,,,,,,,,,,,,,,,,,,,,,,,,,,,,,,,,,,,,,,,,,,,,,,,,,,,,,,,,,,,,,,,
,,,,,,,,,,,,,,,,,,,,,,,,,,,,,,,,,,,,,,,,,,,,,,,,,,,,,,,,,,,,,,,,,,,,,,,,,,,,,,,,,,,,,,,,,,,,,,,,,,,,,,,,,,,,,,,,,,,,,,,,,,,,,,,,,,,,,,,,,,,,,,,,,,,,,,,,,,
